# Supplementary material for: Epidemiology of Plasmodium vivax Malaria Infection in Nepal
Source: PubMed Central journal article supplement (PMC6169153; doi:10.4269/ajtmh.18-0373), 2018-07-16

# Situation analysis of malaria in Jhapa district

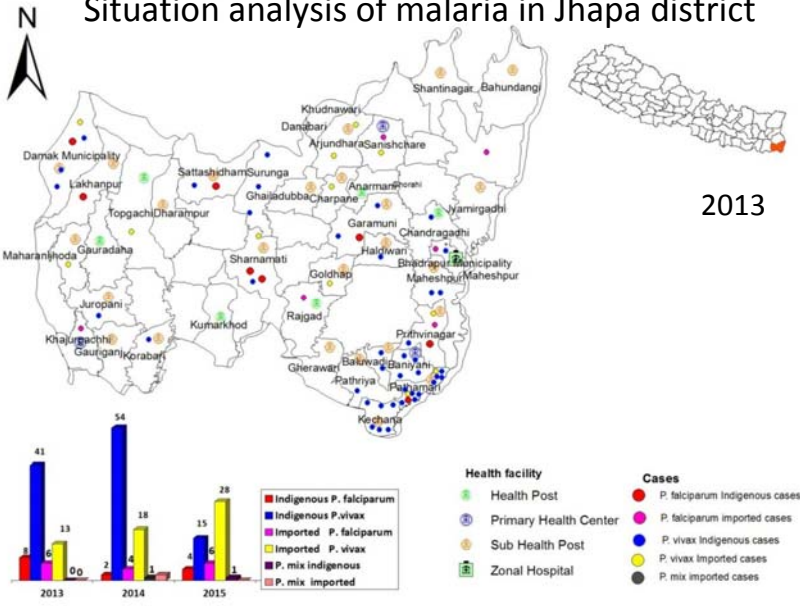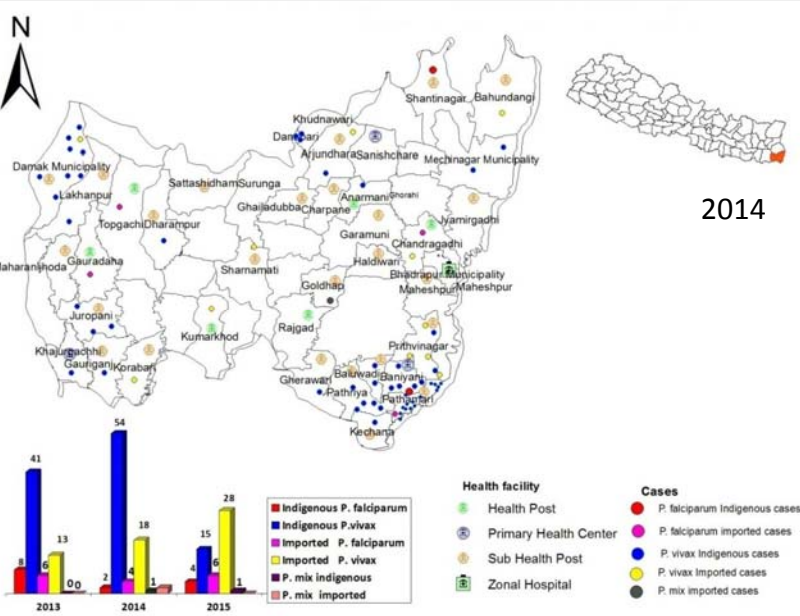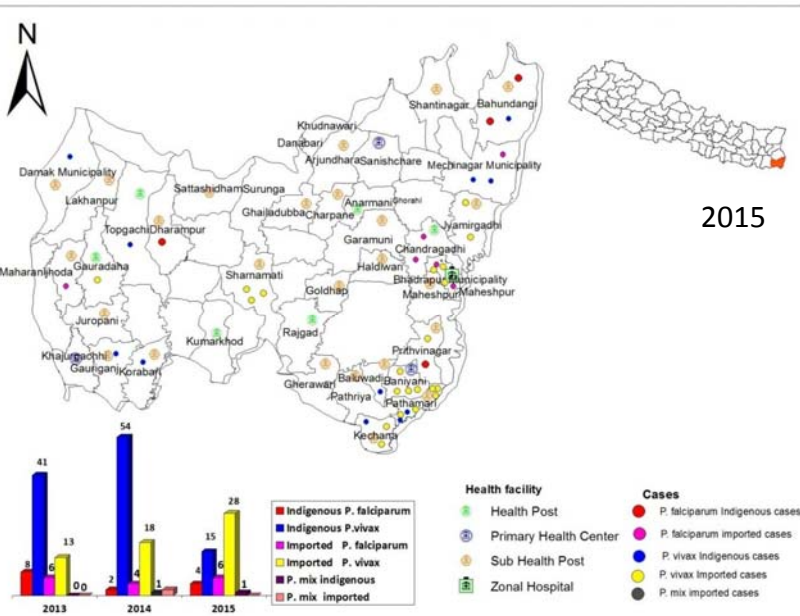

Supplement: tpmd180373.SD3.pdf [file tpmd180373.SD3.pdf]
